# Supplementary material for: Multi-Oxidant Environment as a Suicidal Inhibitor of Myeloperoxidase
Source: MDPI journal article supplement (doi:10.3390/antiox12111936), 2023-10-30
Supplement: s1 [file s1]

**Myeloperoxidase, Human Polymorphonuclear Leukocytes**

**Batch Number:** 3491204  
**Material Number:** 475911-100UG  
**Molecular Weight:** 150000  
**CAS Number:** 9003-99-0  
**E.C. Number:** 1.11.1.7

**Quality Release Date:** 07 AUG 2020  
**Recommended Retest Date:** 31 JAN 2025

**Analytical Data**

| Test                                 | Tolerance                                                                                                                                                                                                                                                            | Results                                                                                                                                                                                                                                                             |
|--------------------------------------|----------------------------------------------------------------------------------------------------------------------------------------------------------------------------------------------------------------------------------------------------------------------|---------------------------------------------------------------------------------------------------------------------------------------------------------------------------------------------------------------------------------------------------------------------|
| <b>Formulation:</b>                  | Lyophilized in 50mM sodium acetate, pH 6.0, 100 – 700mM NaCl                                                                                                                                                                                                         | Lyophilized in 50mM sodium acetate, pH 6.0, 100–700mM NaCl                                                                                                                                                                                                          |
| <b>Solubility:</b>                   | H <sub>2</sub> O (volume is lot specifics and can be found on the product label).<br><br>Further dilute in 100 mM NaCl, 50mM sodium acetate, pH 6.0<br><br>Enzyme may be precipitate out of solution in low ionic strength buffers or in distilled H <sub>2</sub> O. | H <sub>2</sub> O (volume is lot specifics and can be found on the product label).<br><br>Further dilute in 100mM NaCl, 50mM sodium acetate, pH 6.0<br><br>Enzyme may be precipitate out of solution in low ionic strength buffers or in distilled H <sub>2</sub> O. |
| <b>Form:</b>                         | Solid                                                                                                                                                                                                                                                                | Solid                                                                                                                                                                                                                                                               |
| <b>“HBsAg; HIV; HCV antibodies”:</b> | Negative                                                                                                                                                                                                                                                             | Negative                                                                                                                                                                                                                                                            |
| <b>Reconstitution:</b>               | ≥0.0 µL                                                                                                                                                                                                                                                              | 17.1 µL                                                                                                                                                                                                                                                             |
| <b>Specific Activity:</b>            | ≥150.0 U/mgP                                                                                                                                                                                                                                                         | >200 U/mgP                                                                                                                                                                                                                                                          |
| <b>Purity by SDS-PAGE:</b>           | ≥95.0 %                                                                                                                                                                                                                                                              | 95.0 %                                                                                                                                                                                                                                                              |

**Unit Definition:** One unit is defined as the amount of enzyme that will reduce 1.0 µmol H<sub>2</sub>O<sub>2</sub> per min at 25°C, pH 6.0.

**Storage and Handling:** -20°C

This lot conforms to specifications established by EMD Millipore Corporation for this product.



Quality Control/ Assurance Signature

07 AUG 2020  
Date

**EMD Millipore Corporation | 28820 Single Oak Dr., Temecula, CA 92590**

**Technical Support NA +1-800-221-1975 | email: [www.millipore.com/techservices](http://www.millipore.com/techservices) | [www.calbiochem.com](http://www.calbiochem.com)**

**Technical Support All Other Countries - Contact Your Local Office**

**FOR RESEARCH USE ONLY.**

Not for use in diagnostic procedures. Not for human or animal consumption. Purchase of this product does not include any right to resell or transfer, either as a stand-alone product or as a component of another product. Any use of this Product for purpose other than research is strictly prohibited.

Calbiochem and all other trademarks, unless specifically identified as belonging to a third party, are owned by Merck KGaA, Darmstadt, Germany
