# Supplementary material for: Multi-Oxidant Environment as a Suicidal Inhibitor of Myeloperoxidase
Source: MDPI journal article supplement (doi:10.3390/antiox12111936), 2023-10-30
Supplement: s1 [file s1]

# Supplementary Materials

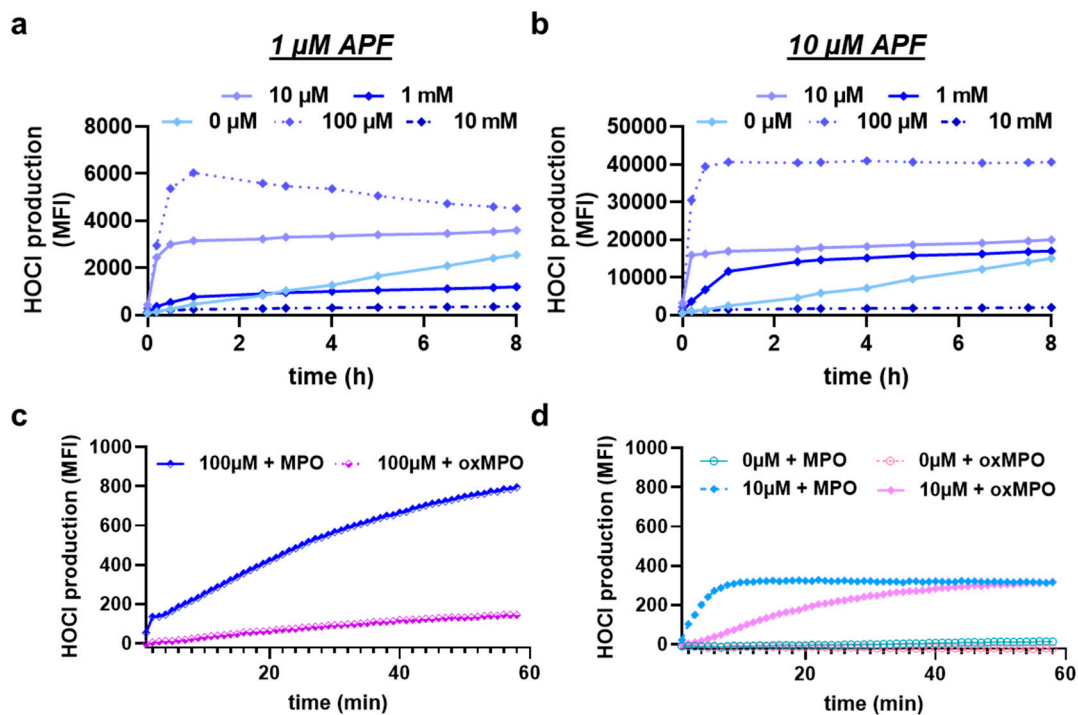

**Figure S1. MPO activity is dependent on H<sub>2</sub>O<sub>2</sub> and APF concentration.** MPO was incubated with 0, 10, 100, 1000 or 10000  $\mu$ M H<sub>2</sub>O<sub>2</sub> to measure HOCl production in the presence of (a) 1  $\mu$ M APF or (b) 10  $\mu$ M APF. (c, d) MPO and plasma-treated MPO were incubated with different concentrations of H<sub>2</sub>O<sub>2</sub> to measure HOCl production.

| modification | mass shift<br>(m/z) | amino acids                                                | fine<br>control |
|--------------|---------------------|------------------------------------------------------------|-----------------|
| +1O          | 15.9949             | A. D. F. G. H. I. L. P. S. T. V. Y. C. E. K. M. N. Q. W. R | common          |
| +2O          | 31.9898             | F. H. I. L. P. S. T. V. Y. C. E. K. M. N. Q. W. R          | common          |
| +3O          | 47.9847             | F. H. I. L. P. Y. C. E. K. M. N. Q. W. R                   | common          |
| -2H+1O       | 13.9792             | A. D. H. I. L. P. S. T. V. Y. C. E. K. M. N. Q. W. R       | common          |
| -1H-1N+1O    | 0.98401             | Q. N                                                       | common          |
| -1H+1N+2O    | 44.9850             | A. D. F. G. H. I. L. P. S. T. V. Y. C. E. K. M. N. Q. W. R | common          |
| -1H+1N+1O    | 28.9901             | C. K. M. N. P. Q. W. Y. F                                  | common          |
| -1H+1N+3O    | 60.9799             | F. I. L. Y. W                                              | common          |
| -1H+1N+4O    | 76.9749             | F. Y. W                                                    | common          |
| -2H+2O       | 29.9741             | F. H. I. L. P. R. S. V. Y. C. K. M. Q. W                   | common          |
| -2H+3O       | 45.9690             | F. I. K. W. Y                                              | common          |
| -1C-1H-1N+2O | 4.97893             | H                                                          | common          |
| -1H+1CI      | 33.9610             | R. N. Q. H. K. F. W. Y                                     | common          |
| -2H          | -2.01565            | A. D. F. H. I. L. P. S. T. V. Y. C. E. K. M. N. Q. W. R    | common          |
| -4H          | -4.03130            | I. K. L. P. Q. S. T. V. W                                  | common          |
| -1C-2H-1O    | -30.0105            | D. E. P                                                    | common          |
| -1C-5H-3N+1O | -43.0534            | R                                                          | common          |
| -1S          | -31.9720            | C                                                          | common          |
| -2H-1S       | -33.9877            | C                                                          | common          |
| -1S+1O       | -15.9771            | C                                                          | common          |
| -2C-1H-1N+1O | -23.0159            | H                                                          | common          |
| -2C-2H-2N+2O | -22.0319            | H                                                          | common          |
| -1C-2H-2N+2O | -10.0319            | H                                                          | common          |
| -3H-1N+1O    | -1.03163            | K                                                          | common          |
| +1C+2O       | 43.9898             | K                                                          | common          |
| +1C+1H+1N+1O | 43.0058             | K. C. D. E                                                 | common          |
| -1C-4H-1S+1O | -32.0084            | M                                                          | common          |
| -1C-2H+3O    | 33.9690             | M                                                          | common          |
| -1C+1O       | 3.99491             | W                                                          | common          |
| -1C+2O       | 19.9898             | W                                                          | common          |
| -4H+2O       | 27.9585             | W                                                          | common          |
| -4H+3O       | 43.9534             | W                                                          | common          |
| +4O          | 63.9796             | W                                                          | common          |
| -2H+2CI      | 67.9220             | W. Y. F                                                    | common          |
| -2H+2N+4O    | 89.9701             | W. Y. F                                                    | common          |

Figure S2. List of modifications used for PMI-Byonic.

| Ar     |              |         | Ar/O <sub>2</sub> |              |         | ArN <sub>2</sub> |              |         |
|--------|--------------|---------|-------------------|--------------|---------|------------------|--------------|---------|
| T mean | oxPTM        | residue | T mean            | oxPTM        | residue | T mean           | oxPTM        | residue |
| 0.85   | +1O          | M577    | 0.90              | +1O          | M688    | 0.42             | +3O          | C309    |
| 0.73   | +1O          | M453    | 0.67              | +1O          | M453    | 0.57             | +3O          | C398    |
| 0.67   | +1O          | M509    | 0.54              | +1O          | M519    | 0.37             | +3O          | C606    |
| 0.53   | +1O          | M588    | 0.53              | +1O          | M551    | 1.00             | +3O          | C663    |
| 0.45   | +1O          | M341    | 0.50              | +1O          | M409    | 0.14             | +2O          | C704    |
| 0.38   | +1O          | M472    | 0.44              | +1O          | M341    | 0.51             | +3O          | C704    |
| 0.36   | +1O          | M631    | 0.40              | +1O          | M644    | 0.15             | +1O          | F222    |
| 0.15   | +1O          | F222    | 0.35              | +1O          | M415    | 0.14             | +1O          | L539    |
| 0.14   | +1O          | L539    | 0.32              | +1O          | M253    | 0.13             | +2O          | L539    |
| 0.14   | +2O          | C704    | 0.31              | +1O          | M588    | 0.11             | -2H+1O       | M253    |
| 0.13   | +2O          | L539    | 0.19              | +1O          | L539    | 0.45             | +1O          | M341    |
| 1.00   | +3O          | C663    | 0.16              | +1O          | F222    | 0.73             | +1O          | M453    |
| 0.51   | +3O          | C704    | 0.13              | +1O          | P238    | 0.38             | +1O          | M472    |
| 0.42   | +3O          | C309    | 0.27              | +2O          | M577    | 0.67             | +1O          | M509    |
| 0.37   | +3O          | C606    | 0.25              | +2O          | M719    | 0.85             | +1O          | M577    |
| 0.10   | -1C+1O       | W535    | 0.18              | +2O          | C704    | 0.15             | -1C-4H-1S+1O | M577    |
| 0.15   | -1C-4H-1S+1O | M577    | 0.61              | +3O          | C398    | 0.53             | +1O          | M588    |
| 0.26   | -1H-1N+1O    | N331    | 0.36              | +3O          | C704    | 0.36             | +1O          | M631    |
| 0.11   | -2H+1O       | M253    | 0.15              | -1C+1O       | W535    | 0.26             | -1H-1N+1O    | N331    |
| 0.10   | -2H+1O       | Y723    | 0.19              | -1C-4H-1S+1O | M588    | 0.10             | -1C+1O       | W535    |
|        |              |         | 0.15              | -1H-1N+1O    | N331    | 0.10             | -2H+1O       | Y723    |
|        |              |         | 0.14              | -2H          | L539    |                  |              |         |
|        |              |         | 0.15              | -2H+1O       | W535    |                  |              |         |
|        |              |         | 0.48              | -2H-1S       | C309    |                  |              |         |
|        |              |         | 0.48              | -2H-1S       | C606    |                  |              |         |
|        |              |         | 0.13              | -2H+1O       | M341    |                  |              |         |

**Figure S3. Oxidative posttranslational modification found on MPO after plasma exposure.** MPO was exposed to gas (control) or plasma, digested with trypsin and measured by Q-Exactive. The significance of the modification compared to gas control was determined using a custom R script that performed a Wilcoxon rank sum test with a cutoff of  $p \leq 0.05$  (T mean).
